# Supplementary material for: The Adhesion of Lactobacillus salivarius REN to a Human Intestinal Epithelial Cell Line Requires S-layer Proteins
Source: Sci Rep. 2017 Mar 10;7:44029. doi: 10.1038/srep44029 (PMC5345100; doi:10.1038/srep44029)
Supplement: Supplementary Information [file srep44029-s1.pdf]

**The Adhesion of *Lactobacillus salivarius* REN to a Human Intestinal Epithelial  
Cell Line Requires S-layer Proteins**

**Ran Wang<sup>1#</sup>, Lun Jiang<sup>1#</sup>, Ming Zhang<sup>2</sup>, Liang Zhao<sup>1</sup>, Yanling Hao<sup>1</sup>, Huiyuan  
Guo<sup>1</sup>, Yue Sang<sup>3</sup>, Hao Zhang<sup>1</sup> & Fazheng Ren<sup>1\*</sup>**

**<sup>1</sup>The Innovation Centre of Food Nutrition and Human Health (Beijing), College  
of Food Science and Nutritional Engineering, China Agricultural University,  
Beijing 100083, P. R. China**

**<sup>2</sup>School of Food and Chemical Engineering, Beijing Technology and Business  
University, Beijing 100048, P. R. China**

**<sup>3</sup>Beijing Higher Institution Engineering Research Center of Animal Product,  
Beijing 100083, P. R. China**

**# R Wang and L Jiang contributed equally to this work**

**\*To whom correspondence should be addressed.**

**Fazheng Ren, China Agricultural University, Beijing 100083, P. R. China.**

**Tel.: 86-010-62736344; fax: 86-010-62736344.**

**Email: renfazheng@263.net**

## **Supplemental Data**

**This article contains Supplemental Fig. S1 and Table S1, S2 and S3.**

**Supplemental Figure S1. The electrostatic potential map of CbpA and ENO1.**

**Supplemental Figure S2. The sequence analysis of SlpA, SlpB and RlpA.**

**Supplemental Figure S3. Enolase (ENO1), the putative CbpA receptor of HT-29 cells.**

**Supplemental Figure S4. Original gel drawing of PCR, SDS-PAGE and Western blotting.**

**Supplemental Table S1. Bacterial strains and plasmids used in this study.**

**Supplemental Table S2. Data collection and refinement statistics of CbpA.\***

**Supplemental Table S3. The list of primers used in the study.**

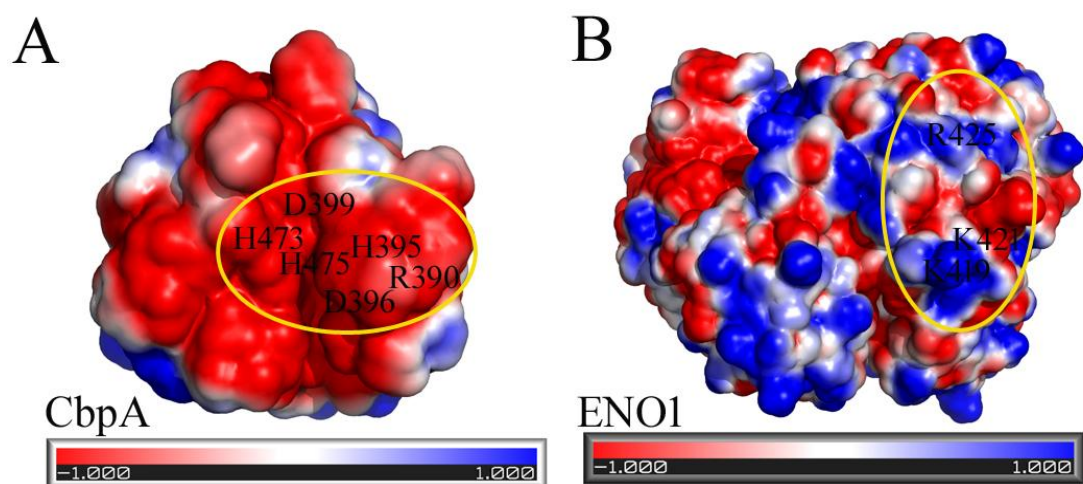

**Supplemental Figure S1.** The electrostatic potential map of **A.** CbpA and **B.** ENO1 (PDB ID: 3B97). The active site of CbpA and the C-terminal of ENO1 are shown in yellow ellipse. The key residues involved in the interaction between CbpA and ENO1 are labeled.



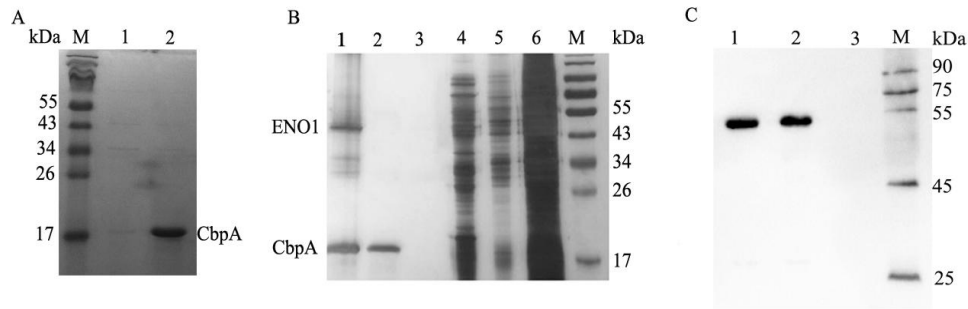

### Supplemental Figure S3. Enolase (ENO1), the putative CbpA receptor of HT-29

cells. **A.** Recombinant CbpA was purified using Ni<sup>2+</sup>-agarose affinity chromatography.

Lane M: marker. Lane 1: flow-through liquid after purification with Ni<sup>2+</sup>-agarose affinity chromatography. Lane 2: purified CbpA. **B.** The receptor of His-CbpA on

HT-29 cells was identified using a His pull-down assay. Lane 1: bait protein (His-CbpA)-prey protein complex. Lane 2: bait protein (His-CbpA). Lane 3: control without bait protein. Lane 4: flow-through bait after binding to glutathione agarose.

Lane 5: flow-through prey after incubation with immobilized bait. Lane 6: lysate of HT-29 cells. **C.** Western blotting analysis with anti-ENO1 polyclonal antibodies.

Extracts from HT-29 cells were co-immunoprecipitated by anti-CbpA antibody.

Co-immunoprecipitated proteins were analyzed by Western blotting with anti-ENO1 polyclonal antibodies. Lane 1: the receptor of His-CbpA. Lane 2: the receptor of

CbpA. Lane 3: the control agarose resin.

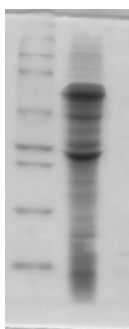

Figure. 2A

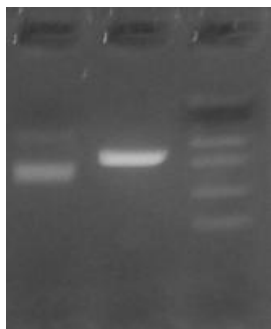

Figure. 2D

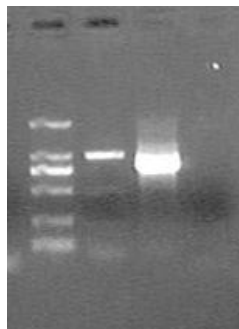

Figure. 2D

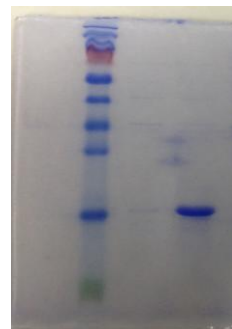

Figure. 6A

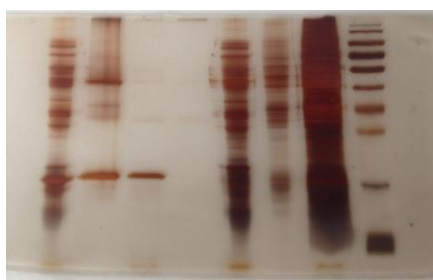

Figure. 6B

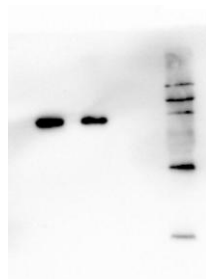

Figure. 6C

**Supplemental Figure S4. Original gel drawing of PCR, SDS-PAGE and Western blotting.**

**Table S1. Bacterial strains and plasmids used in this study.**

| Bacterial strains or plasmids                        | Relevant properties                                                                                     | Reference of source |
|------------------------------------------------------|---------------------------------------------------------------------------------------------------------|---------------------|
| <i>L. salivarius</i> REN                             | Isolated from fecal samples of healthy centenarians                                                     | <sup>1</sup>        |
| <i>L. salivarius</i> REN $\Delta$ <i>cbpA</i>        | <i>L. salivarius</i> REN with deletion of the <i>cbpA</i> gene                                          | This study          |
| <i>L. salivarius</i> REN $\Delta$ <i>nam-amidase</i> | <i>L. salivarius</i> REN with deletion of the <i>nam-amidase</i> gene                                   | This study          |
| <i>E. coli</i> EC1000                                | Host for pORI19, chromosomal <i>repA</i> <sup>+</sup> (pWV01)                                           | <sup>2</sup>        |
| pORI19                                               | Em <sup>r</sup> Ori <sup>+</sup> <i>repA</i> <sup>-</sup> <i>lacZ</i> <sup>'</sup> derivative of pORI28 | <sup>2</sup>        |
| pTRK669                                              | Temperature sensitive-helper plasmid, <i>repA</i> <sup>+</sup> , Cm <sup>r</sup>                        | <sup>3</sup>        |
| pORS001                                              | pORI19 containing flanks of <i>cbpA</i>                                                                 | This study          |
| pORS002                                              | pORI19 containing flanks of <i>NAM-amidase</i>                                                          | This study          |
| pET28b+                                              | Expression vector                                                                                       | This study          |

**Table S2.** Data collection and refinement statistics of CbpA.\*

| CbpA                                                    |                        |
|---------------------------------------------------------|------------------------|
| (PDB: 5GT1)                                             |                        |
| <b>Data collection</b>                                  |                        |
| Wavelength                                              | 1.1000                 |
| Space group                                             | <i>P</i> 43212         |
| Cell dimensions                                         |                        |
| a,b,c (Å)                                               | 95.607, 95.607, 39.208 |
| α,β,γ (°)                                               | 90.0, 90.0, 90.0       |
| Resolution (Å) <sup>†</sup>                             | 50.0-1.85 (1.88-1.85)  |
| <i>R</i> <sub>sym</sub> (%)                             | 9.5 (45.9)             |
| <i>I</i> /σ                                             | 37.0 (3.4)             |
| Completeness (%)                                        | 93.0 (57.2)            |
| Total No. of reflections                                | 415874                 |
| Unique reflections                                      | 16222                  |
| Redundancy                                              | 15.9 (5.2)             |
| <b>Refinement</b>                                       |                        |
| Resolution (Å)                                          | 50.0-1.85 (1.85-1.90)  |
| No. of reflections                                      | 14186 (598)            |
| <i>R</i> <sub>work</sub> / <i>R</i> <sub>free</sub> (%) | 17.2/19.7 (23.8/29.7)  |
| No. of atoms                                            |                        |
| Protein                                                 | 1171                   |
| Ligand/ion                                              | 9                      |
| Water                                                   | 141                    |
| <i>B</i> -factors(Å <sup>2</sup> )                      |                        |
| Protein                                                 | 19.41                  |
| Ligand/ion                                              | 31.20                  |
| Water                                                   | 30.60                  |
| rms deviations                                          |                        |
| Bond lengths (Å)                                        | 0.009                  |
| Bond angles (°)                                         | 1.19                   |
| Ramachandran Plot (%) <sup>1</sup>                      | 97.4/2.6/0.0/0.0       |

\*Three crystal experiments for each structure.

$R_{sym} = \sum_h \sum_i |I_{h,i} - I_h| / \sum_h \sum_i I_{h,i}$ , where  $I_h$  is the mean intensity of the  $i$  observations of symmetry related reflections of  $h$ .

<sup>1</sup>Residues in most favored, additional allowed, generously allowed and disallowed regions of the Ramachandran plot.

**Table S3.** The list of primers used in the study. a: F or R indicates forward primer or reverse primer, b: the underlines stand for restriction enzyme cutting site, c: 5' or 3' indicates location of primer upstream or downstream of target gene.

| primers <sup>a</sup> | Sequence (5'-3') <sup>b</sup>          | Restriction enzyme cutting site | Target <sup>c</sup> |
|----------------------|----------------------------------------|---------------------------------|---------------------|
| AIE51F               | CCGGAATTCCAAACAGGTACTGTCAATGTAGATG     | <i>EcoR</i> I                   | 5' <i>lspA</i>      |
| AI52R                | CCACACCACTATGAACTGCCTCATCAGAACGAACTACT | -                               | 5' <i>lspA</i>      |
| AI33F                | GCAGTTCATAGTGGTGTGGAGTAGTTCGTTCTGATGAG | -                               | 3' <i>lspA</i>      |
| AIB34R               | CGCGGATCCCTGATTAGCAATTCCAT             | <i>BamH</i> I                   | 3' <i>lspA</i>      |
| BIE51F               | CCGGAATTCCAAAAAGGCTGGTTTCAG            | <i>EcoR</i> I                   | 5' <i>lspB</i>      |
| BI52R                | TAGTCAATGGAGTAGTTCATCACCCCTACCTGCTGGT  | -                               | 5' <i>lspB</i>      |
| BI33F                | AACTACTCCATTGACTAACCAGCAGGTAAGGGTGATG  | -                               | 3' <i>lspB</i>      |
| BIB34R               | CGCGGATCCACACCATAACAATAAATCAT          | <i>BamH</i> I                   | 3' <i>lspB</i>      |
| ORI19DF              | GGAAATTATCGTGATCAACAAGTTTA             | -                               | pORI19              |
| ANF                  | CCCATGGGCCAAACAGGTACT                  | <i>Nco</i> I                    | <i>lspA</i>         |

## Reference

1. Zhang, M., Qiao, X. W., Zhao, L., Jiang, L. & Ren, F. Z. *Lactobacillus salivarius* REN counteracted unfavorable 4-nitroquinoline-1-oxide-induced changes in colonic microflora of rats. *J Microbiol* **49**, 877-883 (2011).
2. Law, J. *et al.* A system to generate chromosomal mutations in *Lactococcus lactis* which allows fast analysis of targeted genes. *J Bacteriol* **177**, 7011-7018 (1995).
3. Russell, W. M. & Klaenhammer, T. R. Efficient system for directed integration into the *Lactobacillus acidophilus* and *Lactobacillus gasseri* chromosomes via homologous recombination. *Applied and environmental microbiology* **67**, 4361-4364 (2001).
